# Supplementary material for: Characterization of Natural Anthocyanin Indicator Based on Cellulose Bio-Composite Film for Monitoring the Freshness of Chicken Tenderloin
Source: MDPI journal article supplement (doi:10.3390/molecules27092752), 2022-04-25
Supplement: s1 [file s1]

## Supplementary materials

### Characterization of Natural Anthocyanin Indicator Based on Cellulose Bio-Composite Film for Monitoring the Freshness of Chicken Tenderloin

Athip Boonsiriwit <sup>1,2</sup>, Pontree Itkor <sup>1</sup>, Chanutwat Sirieawphikul <sup>2</sup> and Youn Suk Lee <sup>1,\*</sup>

**Table S1.** The overview of type of biopolymer for anthocyanin bio-composite film fabrication

| Biopolymer                    | Source of anthocyanins          | Anthocyanins content (w/w) | Purpose                                        | Reference                            |
|-------------------------------|---------------------------------|----------------------------|------------------------------------------------|--------------------------------------|
| Agarose                       | Jamun peel                      | NM                         | pH senescing indicator                         | Talukder, <i>et al.</i> [1]          |
| Alginate                      | Black chokeberry                | 8,16,28 and 40%            | Radical scavenging film                        | Kim, <i>et al.</i> [2]               |
| Arrowroot starch              | Blackberry pulp                 | 20, 30 and 40%             | Anti-oxidation film                            | Nogueira, <i>et al.</i> [3]          |
| Bacterial cellulose           | <i>Echium amoenum</i> flowers   | no mentioned               | pH senescing indicator                         | Mohammadalinejad, <i>et al.</i> [4]  |
| κ-Carrageenan/locust bean gum | Cranberry                       | 20%                        | Anti-oxidation film                            | Zepon, <i>et al.</i> [5]             |
| Cassava starch                | Bayberry                        | 1, 2, 3 and 4%             | pH senescing indicator                         | Yun, <i>et al.</i> [6]               |
| Cellulose/chitosan            | Black carrot                    | 1.05%                      | pH senescing indicator                         | Ebrahimi Tirtashi, <i>et al.</i> [7] |
| Chitosan/PVA                  | Black carrot                    | 1%                         | Anti-microbial film                            | Koosha and Hamed <i>et al.</i> [8]   |
| Corn starch                   | Black bean seed and red cabbage | 0.05%                      | pH senescing indicator                         | Prietto, <i>et al.</i> [9]           |
| Furcellaran                   | Blueberry and elderberry        | 5 - 20%                    | pH senescing indicator                         | Jamróz, <i>et al.</i> [10]           |
| Gelatin                       | Black rice bran                 | 0.5, 1, 2 and 2.5 %        | Anti-oxidation film and pH senescing indicator | Ge, <i>et al.</i> [11]               |

|                             |                   |                          |                                        |                             |
|-----------------------------|-------------------|--------------------------|----------------------------------------|-----------------------------|
| Gelatin                     | Blood orange peel | 5 and 10%                | Anti-oxidation film                    | Jridi, <i>et al.</i> [12]   |
| Guar gum                    | Grape pomace      | 0.5, 1, 2.5, 5 and 7.5 % | Anti-oxidation and anti-microbial film | Saurabh, <i>et al.</i> [13] |
| Konjac glucomannan/chitosan | Mulberry          | 3, 6 and 9%              | Anti-oxidation and anti-microbial film | Sun, <i>et al.</i> [14]     |

## Reference

1. Talukder, S.; Mendiratta, S.; Kumar, R.; Agrawal, R.; Soni, A.; Luke, A.; Chand, S. Jamun fruit (*Syzgium cumini*) skin extract based indicator for monitoring chicken patties quality during storage. *Journal of Food Science and Technology* **2020**, *57*, 537-548.
2. Kim, S.; Baek, S.-K.; Song, K.B. Physical and antioxidant properties of alginate films prepared from *Sargassum fulvellum* with black chokeberry extract. *Food Packaging and Shelf Life* **2018**, *18*, 157-163.
3. Nogueira, G.F.; Fakhouri, F.M.; Velasco, J.I.; de Oliveira, R.A. Active edible films based on arrowroot starch with microparticles of blackberry pulp obtained by freeze-drying for food packaging. *Polymers* **2019**, *11*, 1382.
4. Mohammadlinejad, S.; Almasi, H.; Moradi, M. Immobilization of *Echium amoenum* anthocyanins into bacterial cellulose film: A novel colorimetric pH indicator for freshness/spoilage monitoring of shrimp. *Food Control*, **2020**, *113*, 107169, doi:https://doi.org/10.1016/j.foodcont.2020.107169.
5. Zepón, K.M.; Martins, M.M.; Marques, M.S.; Heckler, J.M.; Morisso, F.D.P.; Moreira, M.G.; Ziulkoski, A.L.; Kanis, L.A. Smart wound dressing based on  $\kappa$ -carrageenan/locust bean gum/cranberry extract for monitoring bacterial infections. *Carbohydrate polymers* **2019**, *206*, 362-370.
6. Yun, D.; Cai, H.; Liu, Y.; Xiao, L.; Song, J.; Liu, J. Development of active and intelligent films based on cassava starch and Chinese bayberry (*Myrica rubra* Sieb. et Zucc.) anthocyanins. *RSC advances* **2019**, *9*, 30905-30916.
7. Ebrahimi Tirtashi, F.; Moradi, M.; Tajik, H.; Forough, M.; Ezati, P.; Kuswandi, B. Cellulose/chitosan pH-responsive indicator incorporated with carrot anthocyanins for intelligent food packaging. *International Journal of Biological Macromolecules* **2019**, *136*, 920-926, doi:https://doi.org/10.1016/j.ijbiomac.2019.06.148.
8. Koosha, M.; Hamed, S. Intelligent Chitosan/PVA nanocomposite films containing black carrot anthocyanin and bentonite nanoclays with improved mechanical, thermal and antibacterial properties. *Progress in Organic Coatings*, **2019**, *127*, 338-347.
9. Prietto, L.; Mirapalhete, T.C.; Pinto, V.Z.; Hoffmann, J.F.; Vanier, N.L.; Lim, L.-T.; Dias, A.R.G.; da Rosa Zavareze, E. pH-sensitive films containing anthocyanins extracted from black bean seed coat and red cabbage. *Lwt* **2017**, *80*, 492-500.
10. Jamróz, E.; Kulawik, P.; Guzik, P.; Duda, I. The verification of intelligent properties of furcellaran films with plant extracts on the stored fresh Atlantic mackerel during storage at 2 °C. *Food Hydrocolloids*, **2019**, *97*, 105211, doi:https://doi.org/10.1016/j.foodhyd.2019.105211.
11. Ge, W.; Zhao, Y.; Kong, X.; Sun, H.; Luo, M.; Yao, M.; Wei, B.; Ji, S. Combining salicylic acid and trisodium phosphate alleviates chilling injury in bell pepper (*Capsicum annuum* L.) through enhancing fatty-acid desaturation efficiency and water retention. *Food Chemistry* **2020**, *327*, 127057, doi:https://doi.org/10.1016/j.foodchem.2020.127057.

12. Jridi, M.; Boughriba, S.; Abdelhedi, O.; Nciri, H.; Nasri, R.; Kchaou, H.; Kaya, M.; Sebai, H.; Zouari, N.; Nasri, M. Investigation of physicochemical and antioxidant properties of gelatin edible film mixed with blood orange (*Citrus sinensis*) peel extract. *Food Packaging and Shelf Life*, **2019**, *21*, 100342, doi:<https://doi.org/10.1016/j.fpsl.2019.100342>.
13. Saurabh, C.K.; Gupta, S.; Variyar, P.S. Development of guar gum based active packaging films using grape pomace. *Journal of food science and technology* **2018**, *55*, 1982-1992.
14. Sun, J.; Jiang, H.; Wu, H.; Tong, C.; Pang, J.; Wu, C. Multifunctional bionanocomposite films based on konjac glucomannan/chitosan with nano-ZnO and mulberry anthocyanin extract for active food packaging. *Food Hydrocolloids* **2020**, *107*, 105942.
